# Supplementary material
Source: publisher figshare collection journal article supplement (https://tandf.figshare.com/articles/dataset/_/5896258)
Supplement: Supplementary file 1 [file 2]

# Depositional age and correlation of the Oonah Formation: Refining the timing of Neoproterozoic basin formation in Tasmania

J. A. Mulder<sup>a\*</sup>, R. F. Berry<sup>a</sup>, J. A. Halpin<sup>b</sup>, S. Meffre<sup>a</sup>, and J. L. Everard<sup>c</sup>

<sup>a</sup>ARC Centre of Excellence in Ore Deposits (CODES), School of Physical Sciences, University of Tasmania, Tasmania 7001, Australia

<sup>b</sup> Institute for Marine and Antarctic Studies, University of Tasmania, Tasmania 7000, Australia

<sup>c</sup> Mineral Resources Tasmania, PO Box 56, Rosny Park, Tasmania 7018, Australia

\* E-mail contact: Jmulder@utas.edu.au

## SUPPLEMENTARY PAPERS

*Australian Journal of Earth Sciences* (2018) 65 (3),

<http://dx.doi.org/10.1080/08120099.2018.1426629>

---

Copies of Supplementary Papers may be obtained from the Geological Society of Australia's website ([www.gsa.org.au](http://www.gsa.org.au)), the Australian Journal of Earth Sciences website ([www.ajes.com.au](http://www.ajes.com.au)) or from the National Library of Australia's Pandora archive (<http://nla.gov.au/nla.arc-25194>).

---

## SUPPLEMENTARY PAPERS

Table A1. Cooee Dolerite geochemistry data.

Table A2. Apatite U–Pb data.

Table A3. Sample locations.

Table A4. Detrital zircon U–Pb data.

Table A5. Detrital monazite U–Pb data.
